# Supplementary material for: Investigation of Proposed Ladderane Biosynthetic Genes from Anammox Bacteria by Heterologous Expression in E. coli
Source: PubMed Central journal article supplement (PMC4790861; doi:10.1371/journal.pone.0151087), 2016-03-14
Supplement: pone.0151087.s002.pdf [file pone.0151087.s002.pdf]

S1 Table. Comparison of volumetric energy densities for fused cyclobutanes and petroleum-derived and renewable jet fuels

| <b>Compound or fuel</b>                        | <b>Volumetric energy density (MJ/L)</b> |
|------------------------------------------------|-----------------------------------------|
| Cyclobutane, C <sub>4</sub> H <sub>8</sub>     | 33.0 <sup>a</sup>                       |
| [2]-ladderane, C <sub>6</sub> H <sub>10</sub>  | 42.3 <sup>a</sup>                       |
| [3]-ladderane, C <sub>8</sub> H <sub>12</sub>  | 46.3 <sup>a</sup>                       |
| [4]-ladderane, C <sub>10</sub> H <sub>14</sub> | 49.2 <sup>a</sup>                       |
| [5]-ladderane, C <sub>12</sub> H <sub>16</sub> | 51.4 <sup>a</sup>                       |
| Jet fuel (kerosene) <sup>b</sup>               | 35.06 <sup>c</sup>                      |
| Bio-SPK <sup>b</sup>                           | 33.2 <sup>b</sup>                       |

<sup>a</sup> Calculated using entropies of formation (Novak 2008) and estimated densities from ACD/Labs' PhysChem Suite software

<sup>b</sup> This fuel is the most relevant to commercial aviation in the U.S. Bio-SPK, Bio-Derived Synthetic Paraffinic Kerosene, is a renewable jet fuel in use today (Kallio et al. 2014)

<sup>c</sup> From Hemighaus et al. (2004)

Hemighaus, G., et al. (2004) Aviation Fuels Technical Review, *Chevron Corporation*.

Kallio, P., et al. (2014) Renewable jet fuel, *Current Opinion in Biotechnology* 26, 50-55

Novak, I. (2008) Ring strain in [n]ladderanes, *J. Phys. Chem. A* 112, 10059-10063.
